# Supplementary material for: Antimicrobial use at the end of life: a retrospective cohort study
Source: Research Square preprint supplement (doi:10.21203/rs.3.rs-8345712/v1), 2025-12-31
Supplement: Supplementary file 1 [file 0f0a78462cec3a8a1bcb6b73.docx]

**SUPPLEMENTARY DATA**

**Antimicrobial use at the end of life at Blekinge Hospital: a retrospective cohort study**

**Appendix 1: Data collected from medical records**

| Demographic data | Age |
| --- | --- |
|  | Sex (M/F) |
|  | Specialty unit |
|  | Days at hospital |
|  | Documented EOL discussion (In medical journal/ICD Diagnosis/Both) |
|  | Documented care limitation plan (Y/N) |
| Comorbidities | Malignancy (Y/N) |
|  | Dementia (Y/N) |
|  | COPD (Y/N) |
|  | Cardiovascular disease (Y/N) |
|  | Renal failure (Y/N) |
|  | Stroke (Y/N) |
| Infection data | Category of infection |
|  | Choice of antibiotics |
|  | Continued antibiotics after EOL discussion (Y/N) |
|  | Number of days with continued exposure to antibiotics after EOL discussion |
| Other data | Number of days between EOL discussion and death |
|  | Fluid therapy given after EOL discussion (Y/N) |
